# Supplementary material
Source: PubMed Central journal article supplement (PMC5913964)
Supplement: AAC.02480-17_zac004186984s1.pdf [file AAC.02480-17_zac004186984s1.pdf]

## **Supplemental material**

### **New shuttle vectors for gene cloning and expression in multidrug-resistant *Acinetobacter* species**

by Massimiliano Lucidi, Federica Runci, Giordano Rampioni, Emanuela Frangipani, Livia Leoni and Paolo Visca

**Including figures S1, S2, S3, S4, S5, S6, S7 and tables S1 and S2**

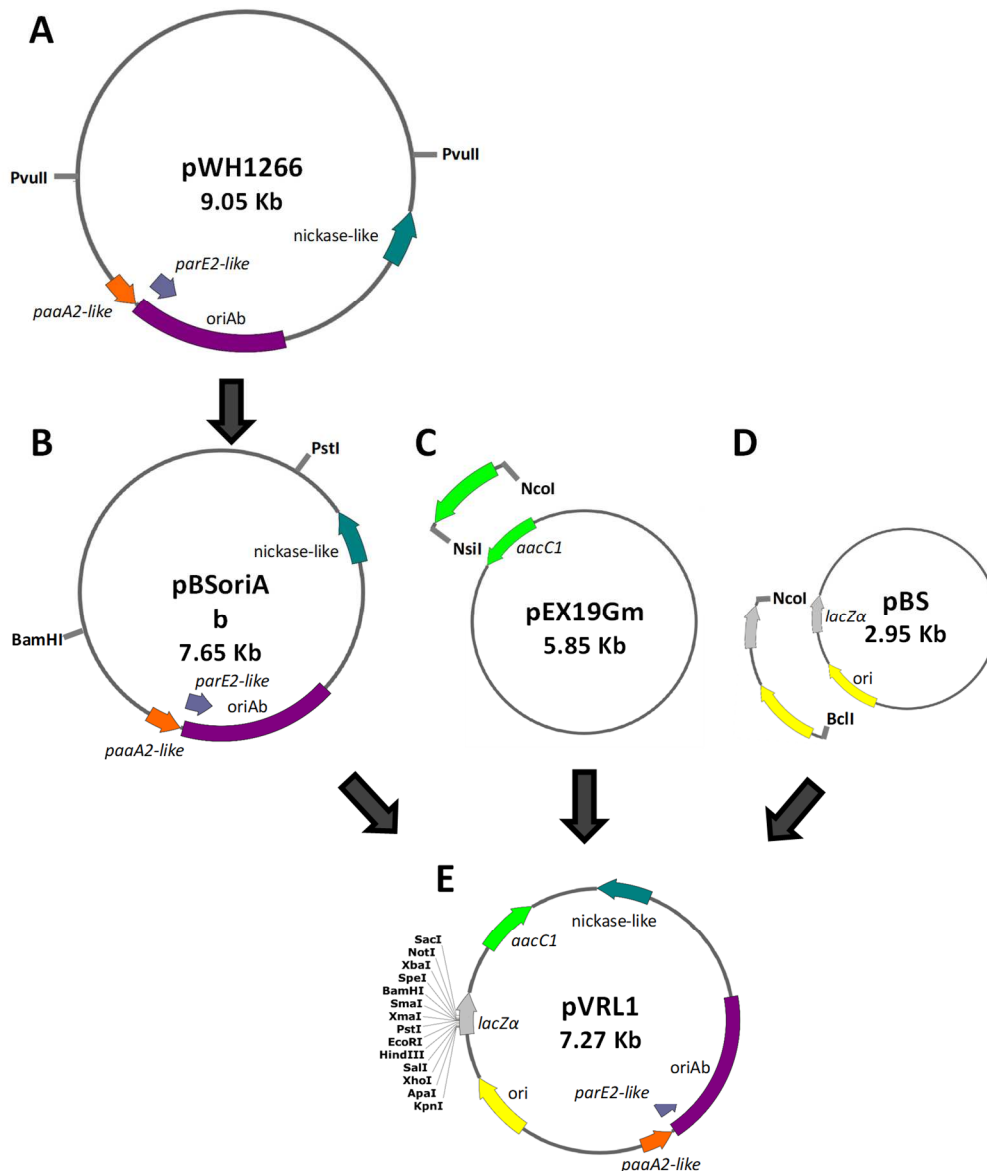

**FIG S1 Schematic representation of cloning steps in pVRL1 construction.** (A) pWH1266 was digested at PvuII restriction sites to obtain the 4,693-bp replication and maintenance region for *A. baumannii*. This region contains the oriAb (violet), *paaA2*-like antitoxin gene (orange), *parE2*-like toxin gene (light purple) and the *nickase*-like gene (cyan). The 4,693-bp fragment was then cloned into the SmaI site of pBS, to obtain pBSoriAb (B). The Gm-resistance cassette (green) was amplified by PCR from pEX19Gm (C), while the ColE1-like origin of replication (yellow) and the MCS within the *lacZα* gene (grey), were amplified by PCR from pBS (D). Amplicons with artificially-introduced restriction sites (Table S1) are shown as external arcs of circle. The oriAb fragment was obtained from pBSoriAb by digestion with BamHI and PstI, while the amplicons derived from pBS and pEX19Gm were digested with BclI/NcoI and NcoI/NsiI, respectively. All the three DNA digestion products were directionally ligated to obtain the pVRL1 vector (E), since BclI-BamHI and NsiI-PstI generate compatible cohesive ends. The relevant features of each plasmid are indicated with colours. Unique cutter restriction enzymes are highlighted in bold. All genes are reported in scale over the total length of the vector. Image obtained by Snapgene software (from GSL Biotech; available at [snapgene.com](http://snapgene.com)).

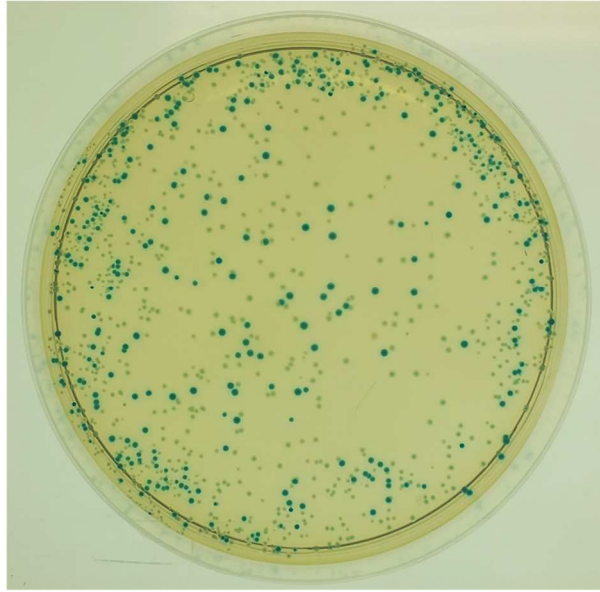

**FIG S2 Blue/white screening for the detection in *E. coli* DH5 $\alpha$  carrying the *trpE*<sub>wt</sub> gene in pVRL1.** The *trpE*<sub>wt</sub> gene was amplified from *A. baumannii* ATCC19606<sup>T</sup> genome and then cloned into the MCS of the pVRL1 plasmid. All white colonies screened contained the *trpE*<sub>wt</sub> gene, whereas blue colonies did not. Clones were screened with both PCR and analytic digestion (data not shown).

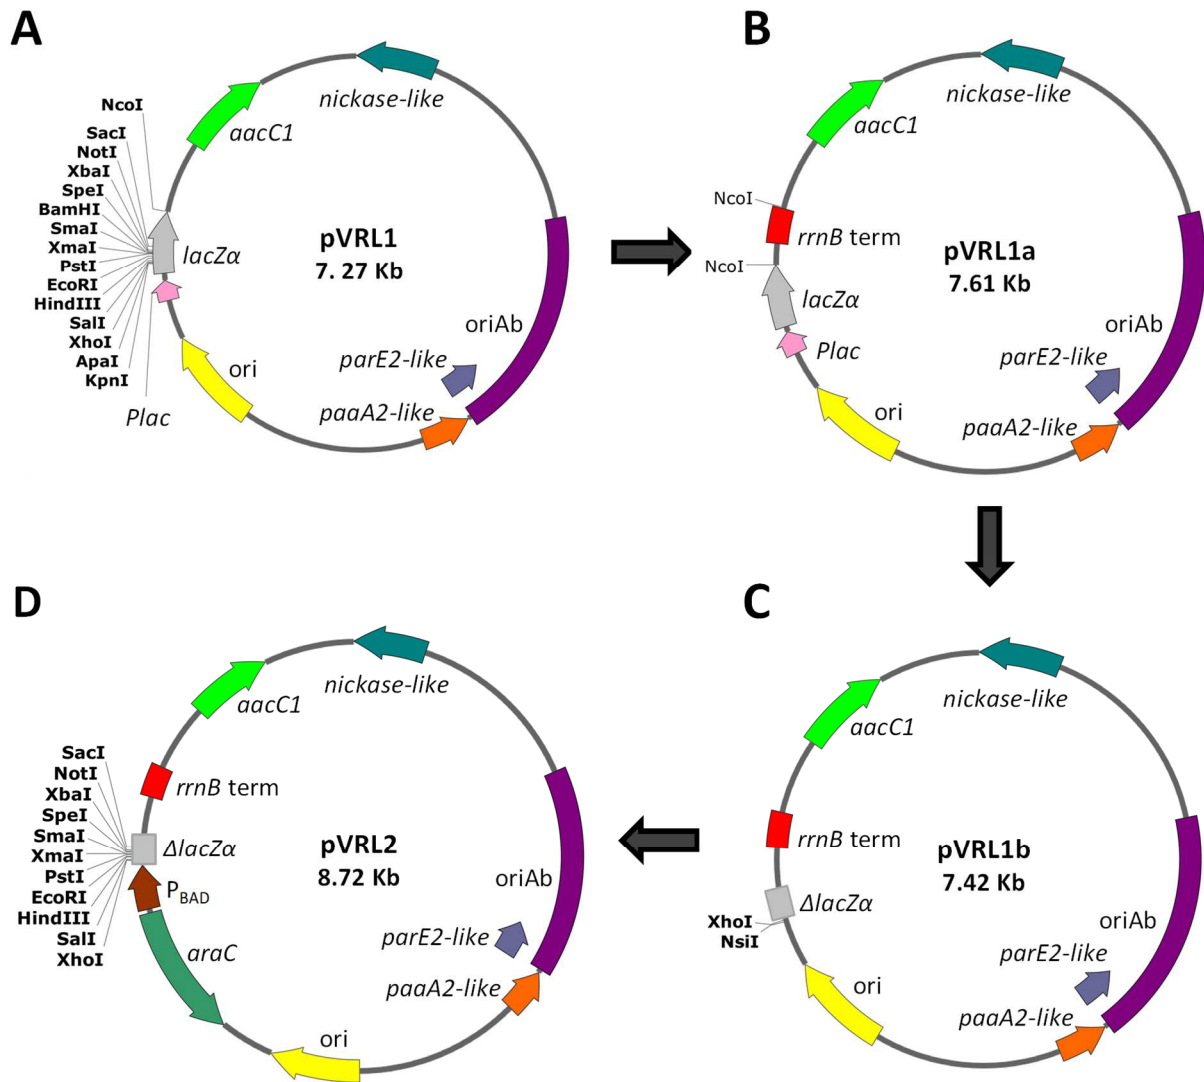

**FIG S3 Schematic representation of cloning steps in pVRL2 construction.** pVRL1 (A) was digested at the unique NcoI restriction site, to insert the *rrnB* transcriptional terminators (*rrnB* term; red box) to obtain pVRL1a (B). The region including the pVRL1a *lac* promoter (*Plac*, pink), CAP binding site and the first 24 codons of the *lacZα* ORF ( $\Delta$ *lacZα*; gray) were deleted to obtain pVRL1b (C). An arabinose inducible regulatory element, composed of the *araC* gene and the  $P_{BAD}$  promoter (indicated in dark green and brown, respectively) was introduced in pVRL1b, to obtain the expression plasmid pVRL2 (D). Relevant features of plasmids are indicated with different colours: Gm-resistance cassette (green); *nickase*-like gene (cyan); *paaA2*-like antitoxin gene (orange); *parE2*-like toxin gene (light purple); ColE1-like origin of replication (yellow); and *oriAb* (violet). Unique cutter restriction enzymes are in bold. All the genes are reported in scale over the total length of the vector. Image obtained by the Snapgene software (from GSL Biotech; available at [snapgene.com](http://snapgene.com)).

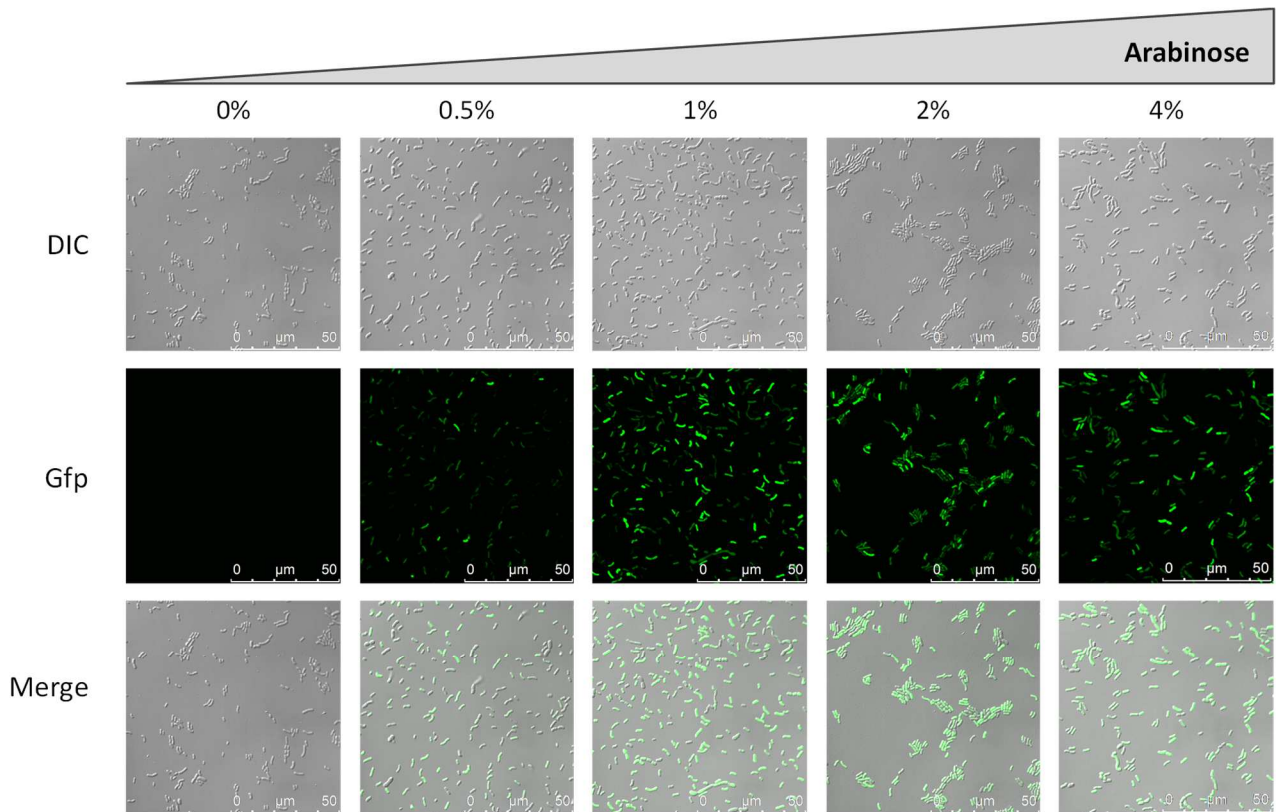

**FIG S4 Arabinose inducible expression of the *gfp* gene under the control of the *araC*- $P_{BAD}$  promoter in plasmid *pVRL2gfp*.** Expression of the fluorescent protein Gfp was investigated using confocal microscopy. Six hours after addition of arabinose, *A. baumannii* ATCC19606<sup>T</sup> cells carrying *pVRL2gfp* were observed by confocal microscopy. The fluorescence emission upon excitation at 475 nm was used to assess the presence of cell-associated fluorescence (Gfp). Representative images are shown. A Leica SP5 confocal laser scanning microscope equipped with a 63 $\times$  oil immersion objective was used. Scale bar, 50  $\mu$ m. DIC, differential interference contrast; Merge, merged DIC and Gfp images.

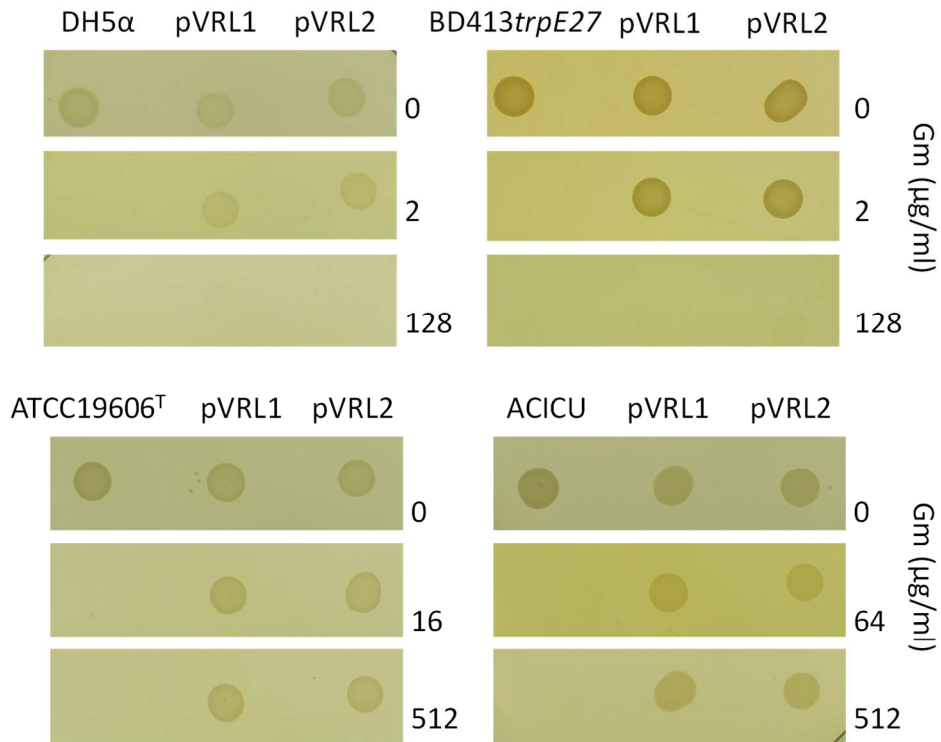

**FIG S5 Minimum Inhibitory Concentration (MIC) of gentamicin on LA for strains carrying the pVRL plasmids.** Bacterial suspensions containing *ca.*  $5 \times 10^4$  CFU were spotted on LA containing different gentamicin (Gm) concentrations (0 to 512  $\mu\text{g/ml}$ ). The MICs, when available, were determined after 24 hours of incubation at 37°C.

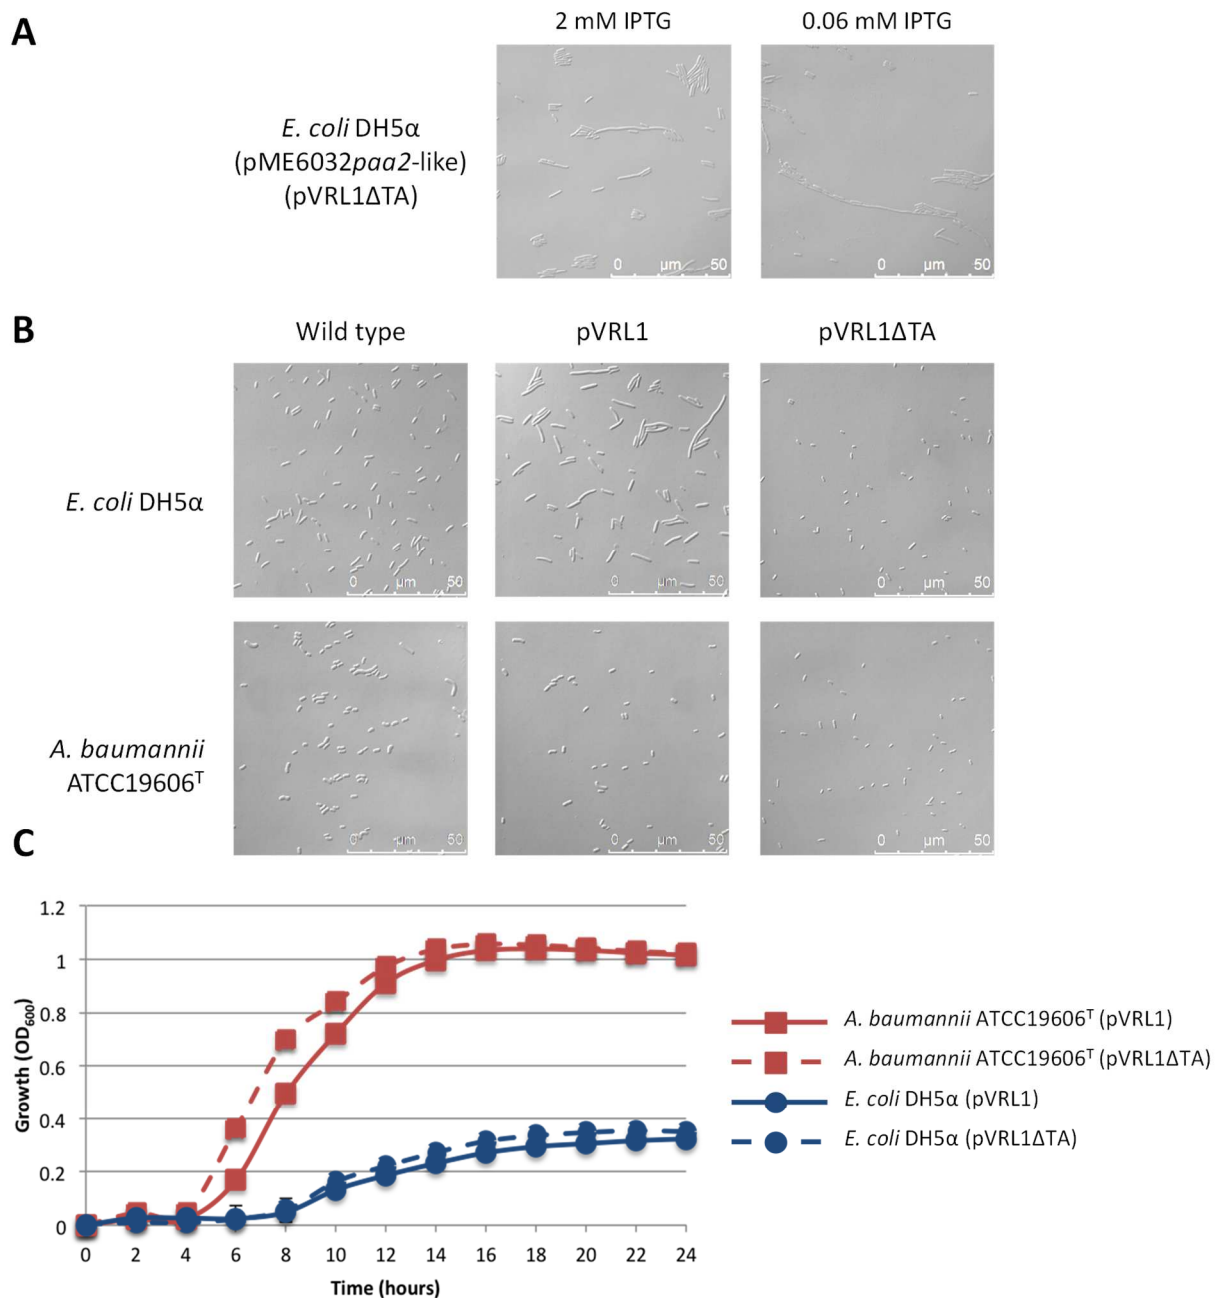

**FIG S6 The presence of a toxin-antitoxin (TA) system affects *E. coli* cell morphology without disturbing bacterial growth.** (A) Morphology of *E. coli* DH5 $\alpha$  harbouring both pVRL1 $\Delta$ *paaA2*-like and pME6032*paaA2*-like plasmids, grown in the presence of IPTG (2 and 0.06 mM), as observed by confocal microscopy. (B) *E. coli* DH5 $\alpha$  and *A. baumannii* ATCC19606<sup>T</sup> cells were observed using confocal microscopy. *E. coli* DH5 $\alpha$  cells harbouring pVRL1 showed a filamentous shape, while deletion of TA system (pVRL1 $\Delta$ TA) restored the normal morphology. No effect on morphology was observed for *A. baumannii* ATCC19606<sup>T</sup>, independently of plasmid carriage. Wild type strains were used as controls. Scale bar: 50  $\mu$ m. (C) Growth of *E. coli* DH5 $\alpha$  and *A. baumannii* ATCC19606<sup>T</sup> harbouring pVRL1 or pVRL1 $\Delta$ TA in LB supplemented with Gm (10  $\mu$ g/ml for *E. coli* and 100  $\mu$ g/ml for *A. baumannii*). Data are the mean  $\pm$  SD of three independent experiments.





**Table S1. Primers**

| <b>Primer</b>         | <b>Restriction site</b> | <b>Sequence (5'-3')<sup>a</sup></b>     | <b>Use</b>                                                                             |
|-----------------------|-------------------------|-----------------------------------------|----------------------------------------------------------------------------------------|
| MCS ori ColE1-like FW | NcoI                    | <b>CATGCCATGGTTACAATTTCCATTCGCCATT</b>  | Amplification of ColE1-like origin, MCS and <i>lacZα</i> from pBS; Sequencing of pVRL1 |
| MCS ori ColE1-like RV | BclI                    | <b>CTGTGATCACAAGTTTACTCATATATACTTTA</b> | Amplification of ColE1-like origin, MCS and <i>lacZα</i> from pBS; Sequencing of pVRL1 |
| <i>aacC1</i> FW       | NcoI                    | <b>CTACCCATGGTTCGTGATACGCCTATTTTTAT</b> | Amplification of gentamicin resistance cassette from pEX19Gm; Sequencing of pVRL1      |
| <i>aacC1</i> RV       | NsiI                    | <b>CCAATGCATACTTGGTCTGACAATCGATG</b>    | Amplification of gentamicin resistance cassette from pEX19Gm; Sequencing of pVRL1      |
| oriAb FW1             | -                       | CAATGAGTAGTCATTTAATTGGC                 | Sequencing of pWH1277-derived portion of pWH1266 and pVRL1                             |
| oriAb FW2             | -                       | GATCGTAGAAATATCTATGATT                  | Sequencing of pWH1277-derived portion of pWH1266 and pVRL1                             |
| oriAb RV              | -                       | GGATTTTAACATTTTGC GTTG                  | Sequencing of pWH1277-derived portion of pWH1266 and pVRL1                             |
| Seq. 1a               | -                       | GAGTTGTTTCGGTAAATTGTCA                  | Sequencing of pWH1277-derived portion of pWH1266 and pVRL1                             |
| Seq. 1b               | -                       | CTAGCCCTTGC GGTTAAGG                    | Sequencing of pWH1277-derived portion of pWH1266 and pVRL1                             |
| Seq. 2                | -                       | TAGATCCTTTTAAATTA AAAATGAA              | Sequencing of pVRL1                                                                    |
| Seq. 3a               | -                       | TAATCGCTTCCTATGACGTT                    | Sequencing of pWH1277-derived portion of pWH1266 and pVRL1                             |
| Seq. 3b               | -                       | TAAGCGGCTGTATGCAGTG                     | Sequencing of                                                                          |

|                         |      |                                       |                                                                                                                            |
|-------------------------|------|---------------------------------------|----------------------------------------------------------------------------------------------------------------------------|
| Seq. 4                  | -    | AATCATCAATTTCAATAGCTGC                | Sequencing of pWH1277-derived portion of pWH1266 and pVRL1                                                                 |
| Seq. 5                  | -    | GTTAATTATTCTTACTAATATTATCT            | Sequencing of pWH1277-derived portion of pWH1266 and pVRL1                                                                 |
| Seq. 6                  | -    | GTTGGGAGTAGGTGGCTAC                   | Sequencing of pVRL1                                                                                                        |
| Seq. 7                  | -    | GGTTTGCATATTGGGCGCTC                  | Sequencing of pVRL1                                                                                                        |
| Seq. 8                  | -    | CGGCTATGTCAAAGATGCTG                  | Sequencing of pWH1277-derived portion of pWH1266 and pVRL1                                                                 |
| Seq. 9                  | -    | CAGCCTGTTGCATCTGCTCAT                 | Sequencing of pWH1277-derived portion of pWH1266 and pVRL1; Verification of correct orientation of <i>rrnB</i> terminators |
| Seq. 10                 | -    | GGTATCTGCGCTCTGCTG                    | Sequencing of pVRL1                                                                                                        |
| Seq. 11                 | -    | CATTCATCGCGCTTGCTGCC                  | Sequencing of pVRL1                                                                                                        |
| Seq. 12                 | -    | GACCACTCCTGCGATGTGTG                  | Sequencing of pWH1277-derived portion of pWH1266 and pVRL1                                                                 |
| <i>rrnB</i> term FW     | NcoI | <b>CATGCCATGGTGCCTGGCGGCAGTAGCG</b>   | Amplification of <i>rrnB</i> terminators from pEX19Gm                                                                      |
| <i>rrnB</i> term RV     | NcoI | <b>CATGCCATGGAAACGCAAAAAGGCCATCCG</b> | Amplification of <i>rrnB</i> terminators from pEX19Gm; Verification of correct orientation of <i>rrnB</i> terminators      |
| $\Delta$ <i>lacP</i> FW | XhoI | <b>CGCCTCGAGGTCAACGGTATC</b>          | Primer flanking <i>lac</i> promoter in pVRL1a used for deletion                                                            |
| $\Delta$ <i>lacP</i> RV | NsiI | <b>CCAATGCATCTTTCCAGTCGGGAAACC</b>    | Primer flanking CAP binding site in pVRL1a used for deletion                                                               |

|                                 |       |                                                  |                                                                                                                                    |
|---------------------------------|-------|--------------------------------------------------|------------------------------------------------------------------------------------------------------------------------------------|
| <i>araC</i> P <sub>BAD</sub> FW | Nsil  | <b>CCAATGCATAATGTGCCTGTCAAAT</b>                 | Amplification of <i>araC</i> and P <sub>BAD</sub> from miniCTX1- <i>araC</i> -P <sub>BAD</sub> - <i>tolB</i> and cloning in pVRL1b |
| <i>araC</i> P <sub>BAD</sub> RV | XhoI  | <b>CCGCTCGAGATTCAGAAGGTTAGCCCCAAA</b>            | Amplification of <i>araC</i> and P <sub>BAD</sub> from miniCTX1- <i>araC</i> -P <sub>BAD</sub> - <i>tolB</i> and cloning in pVRL1b |
| <i>trpE</i> prom.               | XhoI  | <b>CCGCTCGAGTATCTGCTTCACAATCATTAAATGA</b>        | Amplification of <i>trpE</i> gene with its endogenous promoter                                                                     |
| <i>trpE</i> ATG FW              | XhoI  | <b>CCGCTCGAGATGACTACATTAGCGCAATTCG</b>           | Amplification of <i>trpE</i> gene                                                                                                  |
| <i>trpE</i> RV                  | PstI  | <b>AAA<u>ACTGCAGTC</u>CATAAAATCAATCCGTTTGATG</b> | Amplification of <i>trpE</i> gene                                                                                                  |
| <i>lacZ</i> FW                  | XhoI  | <b>CCGCTCGAGATGACCATGATTACGGATTAC</b>            | Amplification of <i>lacZ</i> gene                                                                                                  |
| <i>lacZ</i> RV                  | PstI  | <b>AAA<u>ACTGCAGT</u>TATTTTTGACACCAGACCAACT</b>  | Amplification of <i>lacZ</i> gene                                                                                                  |
| <i>tetA</i> FW                  | XhoI  | <b>CCGCTCGAGATGAAATCTAACAATGCGCTCA</b>           | Amplification of <i>tetA</i> gene                                                                                                  |
| <i>tetA</i> RV                  | PstI  | <b>AAA<u>ACTGCAGG</u>GAGGTGCCGCCGGCTTC</b>       | Amplification of <i>tetA</i> gene                                                                                                  |
| <i>mCherry</i> FW               | XhoI  | <b>CCTCTCGAGGTGAGCAAGGGCGAGGAG</b>               | Amplification of <i>mCherry</i> gene                                                                                               |
| <i>mCherry</i> RV               | EcoRI | <b>CCGGAATTCTCACTTGTACAGCTCGTCC</b>              | Amplification of <i>mCherry</i> gene                                                                                               |
| Zeo1 FW                         | Nsil  | <b>CCAATGCATTTCCTTACGCATCTGTGC</b>               | Amplification of zeocin resistance cassette from pCR <sup>TM</sup> -Blunt II-TOPO <sup>®</sup>                                     |
| Zeo1 RV                         | Nsil  | <b>CCAATGCATGTGTCAGTCCTGCTCCTCG</b>              | Amplification of zeocin resistance cassette from pCR <sup>TM</sup> -Blunt II-TOPO <sup>®</sup>                                     |
| Zeo2 FW                         | KpnI  | <b>GGTGGTACCTTTCTCCTTACGCATCTGTGC</b>            | Amplification of zeocin resistance cassette from pCR <sup>TM</sup> -Blunt II-TOPO <sup>®</sup>                                     |
| Zeo2 Rv                         | Apal  | <b>ACCGGGCCCGTGTGTCAGTCCTGCTCCTC</b>             | Amplification of zeocin resistance cassette from pCR <sup>TM</sup> -Blunt II-TOPO <sup>®</sup>                                     |

|                         |       |                                          |                                                                                                                                                                                                                             |
|-------------------------|-------|------------------------------------------|-----------------------------------------------------------------------------------------------------------------------------------------------------------------------------------------------------------------------------|
| pVRL1Δ <i>aacC1</i> FW  | NsiI  | <b>CCTATGCATCTACTTGCATTACAGTTTACGAAC</b> | Primer flanking <i>aacC1</i> gene in pVRL1 used for deletion of Gm resistance cassette                                                                                                                                      |
| pVRL1Δ <i>aacC1</i> RV  | NsiI  | <b>CCAATGCATACCAAGTATGCAGCCCCT</b>       | Primer flanking <i>aacC1</i> gene in pVRL1 used for deletion of Gm resistance cassette                                                                                                                                      |
| pVRL2Δ <i>aacC1</i> FW  | KpnI  | <b>CCGGGTACCCTACTTGCATTACAGTTTACGAAC</b> | Primer flanking <i>aacC1</i> gene in pVRL2 used for deletion of Gm resistance cassette                                                                                                                                      |
| pVRL2Δ <i>aacC1</i> RV  | Apal  | <b>ACCGGGCCCACCAAGTATGCAGCCCCT</b>       | Primer flanking <i>aacC1</i> gene in pVRL2 used for deletion of Gm resistance cassette                                                                                                                                      |
| ΔTA FW                  | -     | CTTACTCATGTACTTTGGATTATTTAG              | Primer flanking TA system in pVRL1 used for deletion (generation of pVRL1ΔTA)                                                                                                                                               |
| ΔTA RV                  | BclI  | <b>CTCTGATCAGTTTTTCACTCCAATGTGTTAC</b>   | Primer flanking the antitoxin gene <i>paaA2</i> -like system in pVRL1 used for the deletion of the TA system (generation of pVRL1ΔTA) and the deletion of <i>paaA2</i> -like gene (generation of pVRL1Δ <i>paaA2</i> -like) |
| Δ <i>paaA2</i> -like FW | -     | ATGAAGATTGAGTGGACTG                      | Primer flanking the antitoxin <i>paaA2</i> -like gene in pVRL1 used for the deletion of <i>paaA2</i> -like gene (generation of pVRL1Δ <i>paaA2</i> -like)                                                                   |
| <i>paaA2</i> -like FW   | EcoRI | <b>CCGGAATTCATGACAGAAGCGACTTTTAC</b>     | Amplification of <i>paaA2</i> -like antitoxin gene                                                                                                                                                                          |
| <i>paaA2</i> -like RV   | SacI  | <b>ACCGAGCTCTCCACTCAATCTTCATTCTCG</b>    | Amplification of <i>paaA2</i> -like antitoxin gene                                                                                                                                                                          |
| <i>aacC1</i> PCN FW     | -     | GATCTATATCTATGATCTCGC                    | Determination of pVRL1 copy number in <i>E. coli</i> and <i>A. baumannii</i>                                                                                                                                                |

|                     |   |                      |                                                                                                                                                                             |
|---------------------|---|----------------------|-----------------------------------------------------------------------------------------------------------------------------------------------------------------------------|
| <i>aacC1</i> PCN RV | - | GATCACATAAGCACCAAGCG | Determination of pVRL1 copy number in <i>E. coli</i> and <i>A. baumannii</i>                                                                                                |
| <i>dxs</i> Ab FW    | - | AGTTTGGGATGTGGGACACC | Determination of pVRL1 copy number in <i>A. baumannii</i> . Amplification from nt 195,274 to nt 195,387 encompassing an internal fragment (113 bp) of gene HMPREF0010_01955 |
| <i>dxs</i> Ab RV    | - | CTTCTCTGGCTGGGAAAGCA | Determination of pVRL1 copy number in <i>A. baumannii</i> . Amplification from nt 195,274 to nt 195,387 encompassing an internal fragment (113 bp) of gene HMPREF0010_01955 |
| <i>dxs</i> Ec FW    | - | CGAGAAACTGGCGATCCTTA | Determination of pVRL1 copy number in <i>E. coli</i> . Amplification from nt 436,807 to nt 436,694 encompassing an internal fragment (113 bp) of gene G6237                 |
| <i>dxs</i> Ec RV    | - | CTTCATCAAGCGGTTTCACA | Determination of pVRL1 copy number in <i>E. coli</i> . Amplification from nt 436,807 to nt 436,694 encompassing an internal fragment (113 bp) of gene G6237                 |

---

<sup>a</sup>GC clamps are shown in bold; restriction sites are underlined.

**Table S2. Comparison of I-TASSER and SWISS-MODEL prediction scores for the ParE2-PaaA2-like toxin-antitoxin system of pWH1277**

| Predicted protein (ORF)    | Accession number of proteins predicted by BLASTX analyses | I-TASSER template (PDB ID; reference)        | TM-score <sup>a</sup> | SWISS-MODEL template (PDB ID; reference)     | QMEAN <sup>b</sup> |
|----------------------------|-----------------------------------------------------------|----------------------------------------------|-----------------------|----------------------------------------------|--------------------|
| Putative toxin (ORF-3)     | WP005166293.1                                             | <i>E. coli</i> ParE2 toxin (5CW7; ref. 1)    | 0.969                 | <i>E. coli</i> ParE2 toxin (5CW7; ref. 1)    | -1.48              |
| Putative antitoxin (ORF-2) | WP005166297.1                                             | <i>E. coli</i> YafQ antitoxin (4ML0; ref. 2) | 0.571                 | <i>E. coli</i> YafQ antitoxin (4Q2U; ref. 3) | -2.43              |

<sup>a</sup>TM-score is a measure of global structural similarity between query and template protein; the value is comprised between 0 (lowest similarity) and 1 (highest similarity);

<sup>b</sup>The global and per-residue model quality has been assessed using the QMEAN scoring function (4).

### Supplementary references

1. Sterckx YG, Jove T, Shkumatov AV, Garcia-Pino A, Geerts L, De Kerpel M, Lah J, De Greve H, Van Melderen L, Loris, R. 2016. A unique hetero-hexadecameric architecture displayed by the *Escherichia coli* O157 PaaA2-ParE2 antitoxin-toxin complex. *J Mol Biol.* 428: 1589-1603.
2. Liang Y, Gao Z, Wang F, Zhang Y, Dong Y, Liu Q. 2014. Structural and functional characterization of *Escherichia coli* toxin-antitoxin complex DinJ-Yafq. *J Biol Chem* 289:21191-21202.
3. Ruangprasert A, Maehigashi T, Miles SJ, Giridharan N, Liu JX, Dunham CM. 2014. Mechanisms of toxin inhibition and transcriptional repression by *Escherichia coli* DinJ-YafQ. *J Biol Chem* 289:20559-20569.
4. Benkert P, Biasini M, Schwede T. 2011. Toward the estimation of the absolute quality of individual protein structure models. *Bioinformatics* 27:343-350.
